# Supplementary material
Source: publisher figshare collection journal article supplement (https://frontiersin.figshare.com/ndownloader/files/24161747)
Supplement: Supplementary file 1 [file 24161747]

**Citizen Scientists Help Detect and Classify Dynamically Triggered Seismic Activity in Alaska**

Vivian Tang1, Boris Rösler1, Jordan Nelson2, JaCoya Thompson3, Suzan van der Lee1,4,5, Kevin Chao1,4, Michelle Paulsen5, and Earthquake Detectives6

1Department of Earth and Planetary Sciences, Northwestern University, Evanston, IL 60208

2Department of Chemistry, Northwestern University, Evanston, IL 60208

3Department of Computer Sciences, Northwestern University, Evanston, IL 60208

4Northwestern Institute on Complex Systems, Northwestern University, Evanston, IL 60208

5Center for Interdisciplinary Exploration and Research in Astrophysics, Northwestern University, Evanston, IL 60208

6Zooniverse (<https://www.zooniverse.org/>)

**Corresponding author:** Vivian Tang; Department of Earth and Planetary Sciences, Northwestern University, Evanston, IL 60208; Phone: +1-847-467-2467; Email:

[vivian@earth.northwestern.edu](mailto:vivian@earth.northwestern.edu)

**Contents of this file**

Figures S1 to S8

**Introduction**

This supporting information contains interface diagrams for the “Earthquake Detectives” project (figure S1-S5). Figures S6 to S8 show waveforms recorded at stations in figures 6 to 8 in the manuscript.


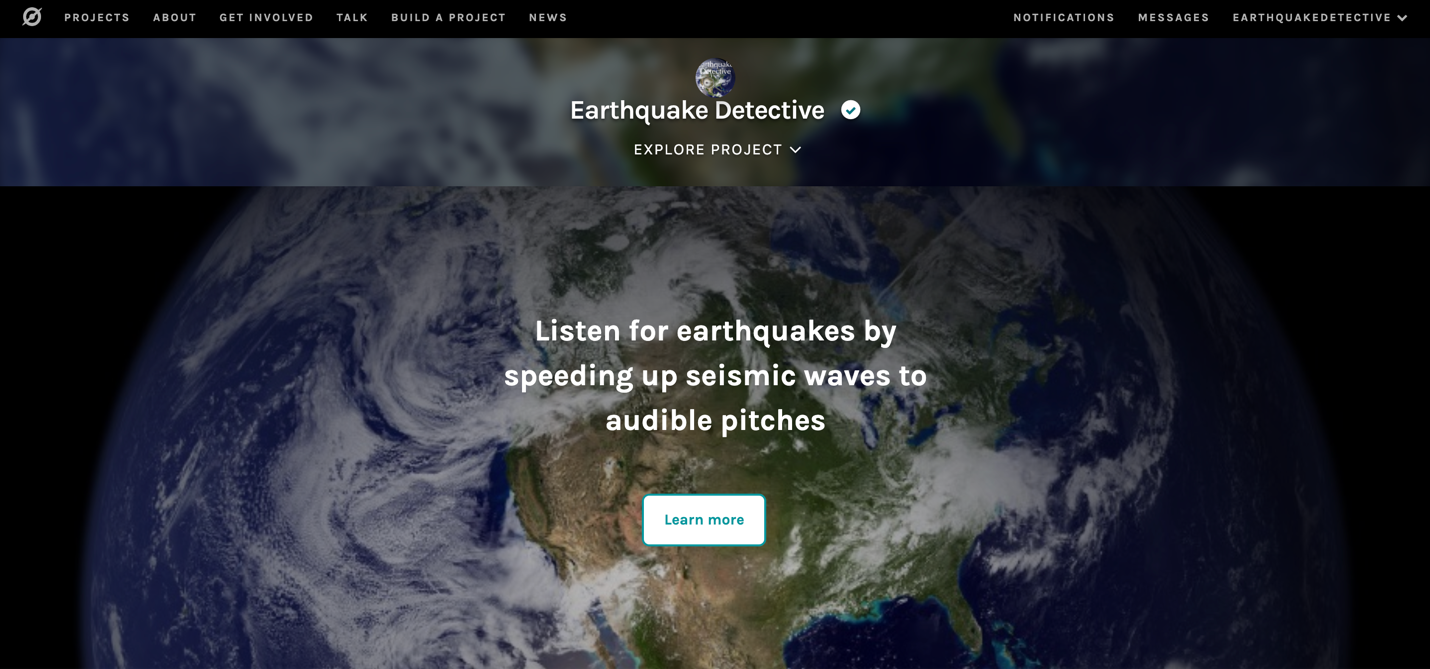


Figure S1. Interface diagram of the main page of the project.


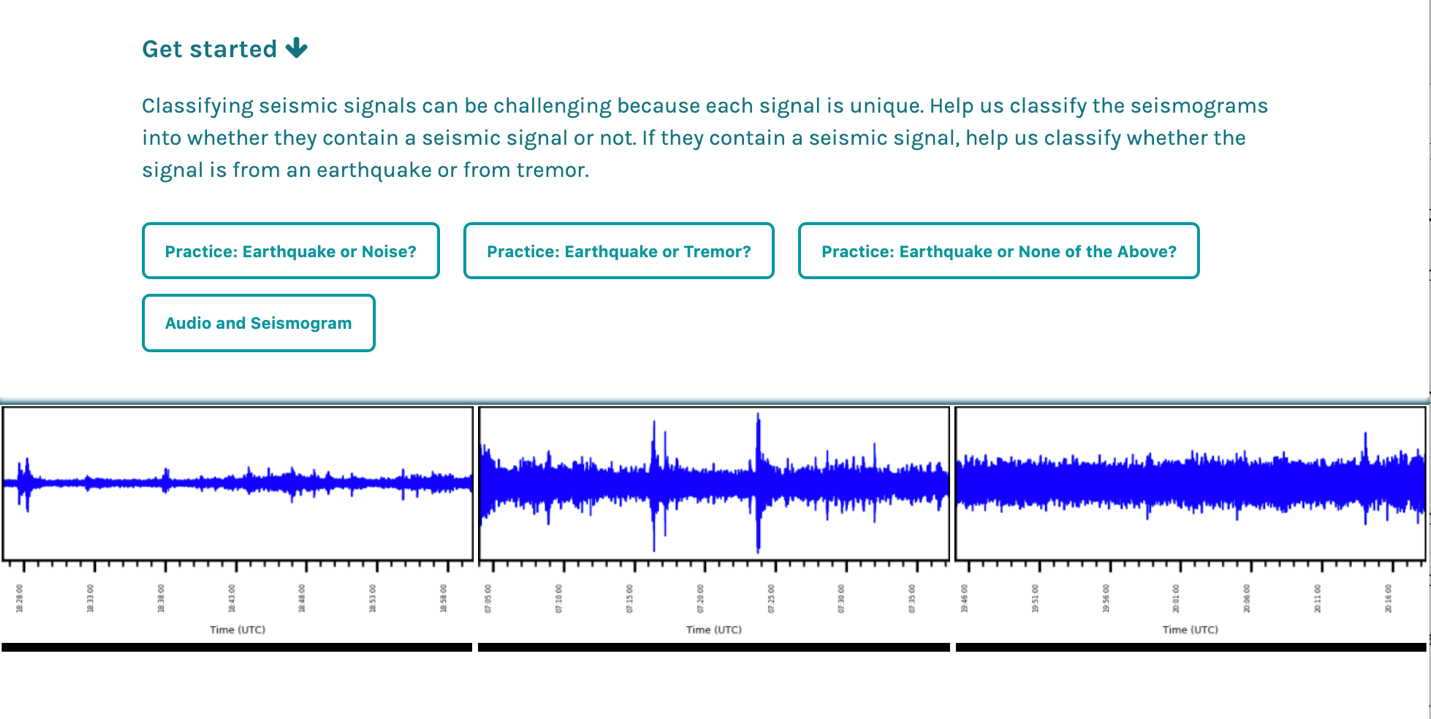


**Figure S2.** Access to the three practice sessions to train our volunteers on the different signals.


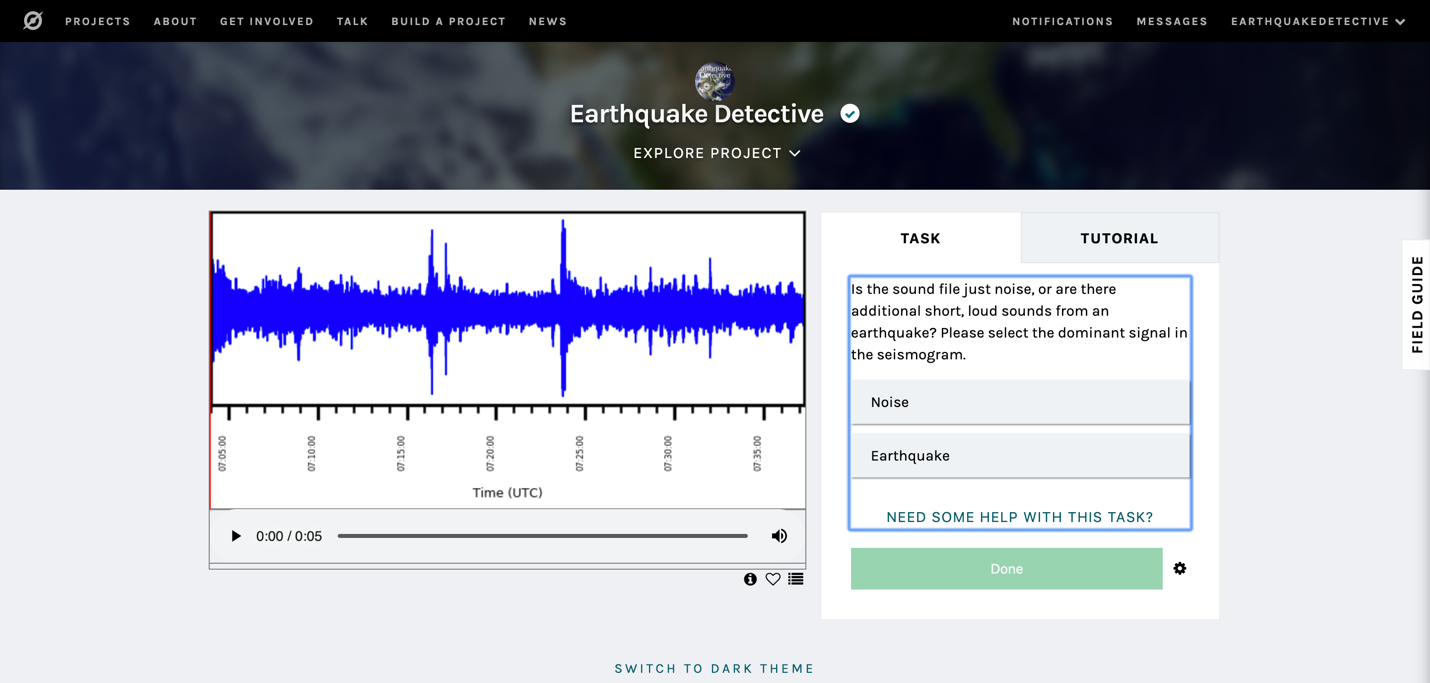


**Figure S3.** View of a “subject” in the practice session. Citizen scientists learn to distinguish between earthquake and the absence of signals (nose) by looking at the seismogram and listening to an accelerated version of it.


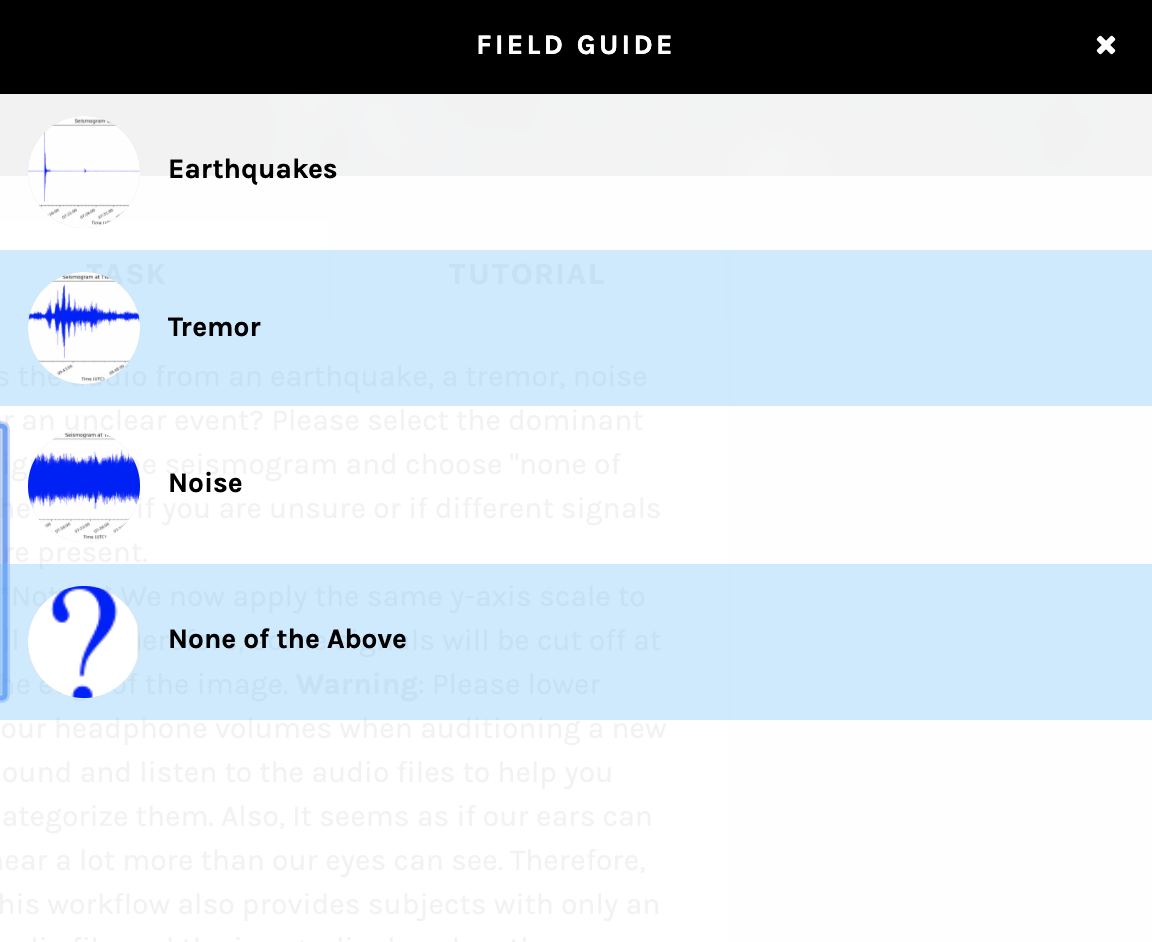


**Figure S4**. Volunteers are asked to distinguish four different signals: earthquakes, tremor, noise and none of the above. Explanations for these four categories are presented in the field guide.


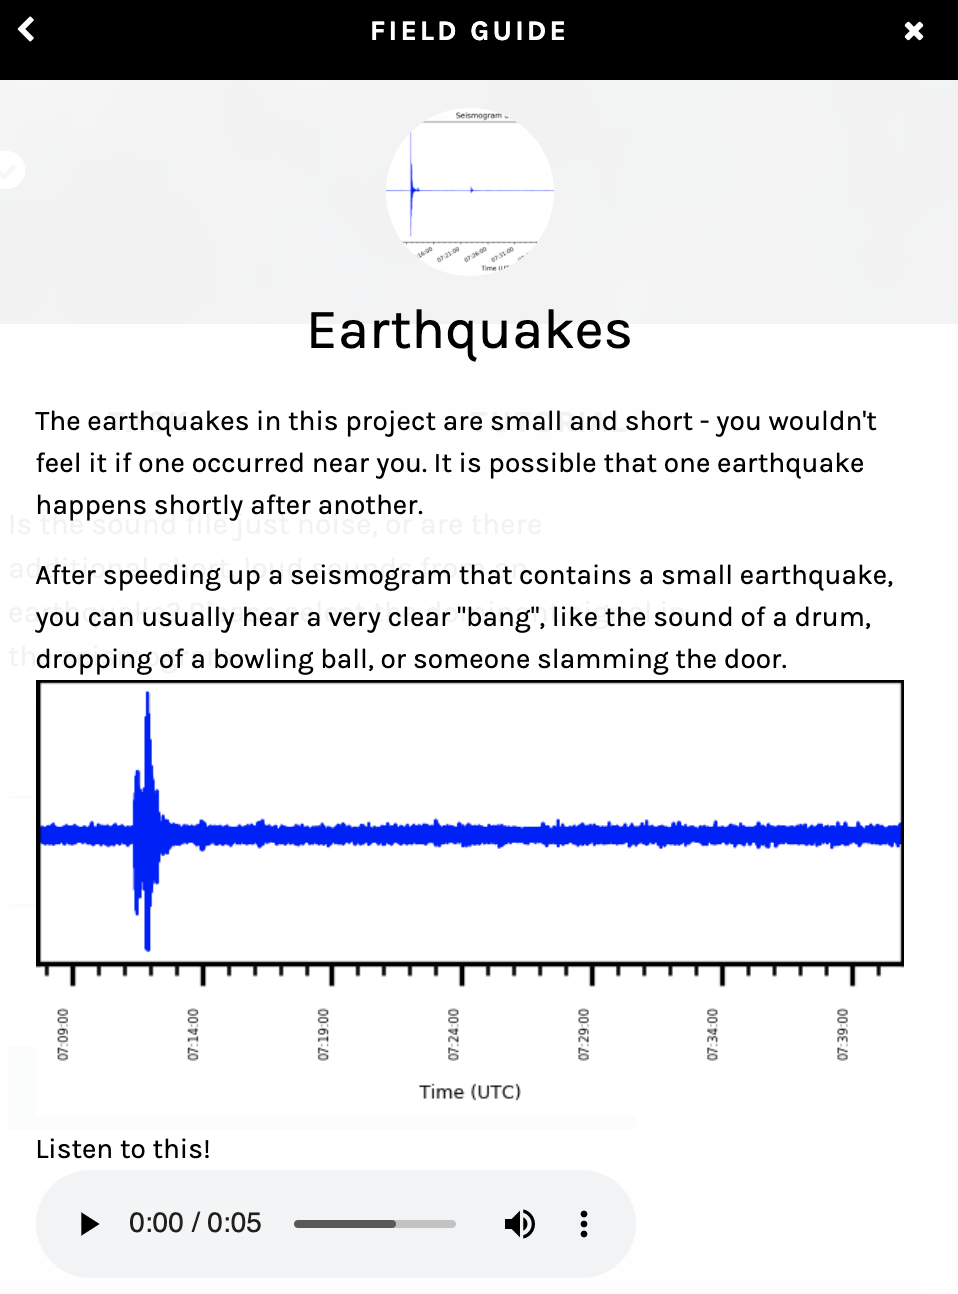


**Figure S5.** The field guide presents examples of a seismogram and the converted audio data for each category.


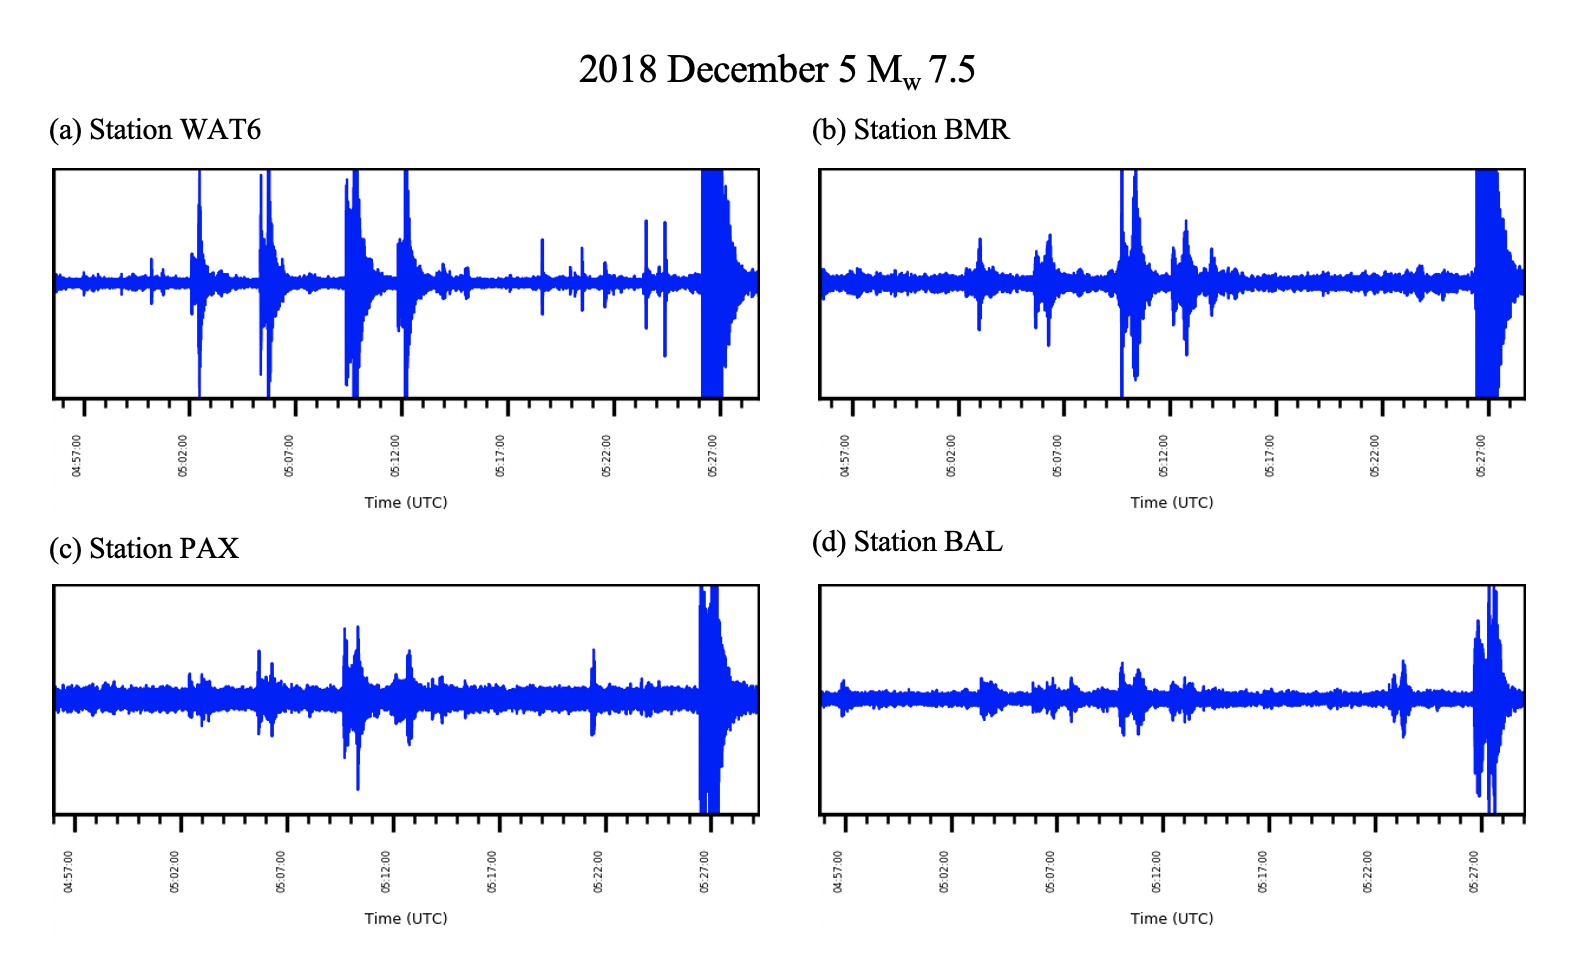


**Figure S6.** Earthquakes triggered by the December 5, 2018 Mw 7.5 earthquake. Shown are seismograms for which (a) 10 out of 10 citizen scientists agreed, (b) 9 out of 10 agreed, (c) 8 out of 10 agreed and (d) 7 out of 10 citizen scientists agreed.


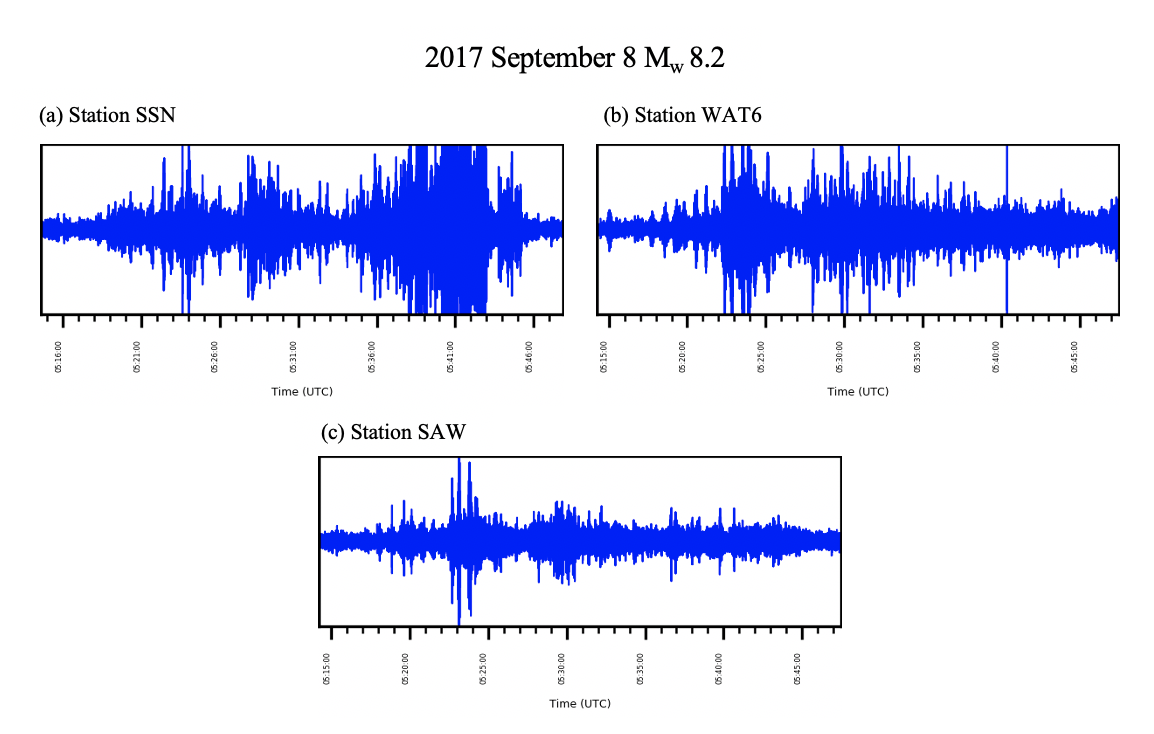


**Figure S7.** Tremors triggered by the September 8, 2017 Mw 8.2 Mexico earthquake. Shown are seismograms for which (a) 9 out of 10 citizen scientists agreed, (b) 8 out of 10 agreed and (c) 7 out of 10 citizen scientists agreed.


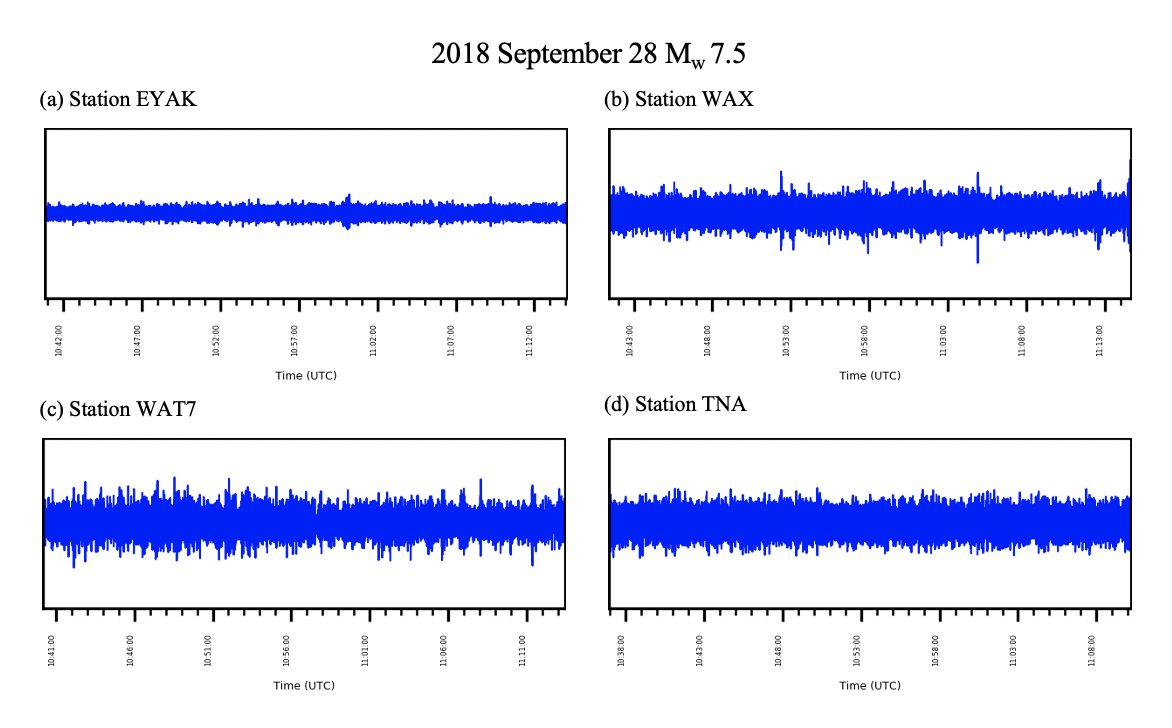


**Figure S8.** Noises recorded during the passage of surface waves from the September 28, 2018 Mw 7.5 Sulawesi earthquake. Shown are seismograms for (a) 10 out of 10 citizen scientists agreed, (b) 9 out of 10 agreed, (c) 8 out of 10 agreed and (d) 7 out of 10 citizen scientists agreed.
